# Supplementary material
Source: PubMed Central journal article supplement (PMC4048735)

**SUPPLEMENTAL MATERIAL**

**Supplemental Table 1. Proportion of PCI-treated Versus Diseased Vessels Among Patients With Multi-vessel Disease and No History of CABG Undergoing TRI Procedures According to Operator TRI Volume**

| #Treated vessel / #diseased vessel   | 1-10<br>(N=3,812) | 11-50<br>(N=10,377) | 51-100<br>(N=5,286) | >100<br>(N=3,077) |
|--------------------------------------|-------------------|---------------------|---------------------|-------------------|
| 1/2                                  | 2,169 (24.8)      | 5,873 (24.9)        | 3,029 (26.3)        | 1,700 (25.2)      |
| 1/3                                  | 690 (7.9)         | 1,758 (7.5)         | 947 (8.2)           | 544 (8.1)         |
| 2/2                                  | 657 (7.5)         | 1,758 (7.5)         | 855 (7.4)           | 544 (8.1)         |
| 2/3                                  | 215 (2.5)         | 609 (2.6)           | 330 (2.9)           | 207 (3.1)         |
| 3/3                                  | 26 (0.3)          | 85 (0.4)            | 51 (0.4)            | 30 (0.4)          |
| Either #treated or #diseased missing | 55 (0.6)          | 194 (0.8)           | 74 (0.6)            | 52 (0.8)          |

**Supplemental Table 2. Evaluation of the Relationship Between Procedural Outcomes and TRI Volume Using Linear Splines**

| <b>Outcome</b>   | <b>Knot Point (<math>k_0</math>)</b> | <b>Slope (<math>\beta_1</math>) for Radial Volume <math>\leq k_0</math></b> | <b>Slope (<math>\beta_2</math>) for Radial Volume <math>&gt; k_0</math></b> | <b>P-Value for <math>H_0: \beta_1 \neq \beta_2</math></b> | <b>AIC</b> |
|------------------|--------------------------------------|-----------------------------------------------------------------------------|-----------------------------------------------------------------------------|-----------------------------------------------------------|------------|
| Fluoroscopy time | 30                                   | -0.51 (-0.64, -0.39)                                                        | -0.04 (-0.08, 0.01)                                                         | < 0.001                                                   | 402287     |
|                  | 35                                   | -0.45 (-0.56, -0.34)                                                        | -0.03 (-0.07, 0.02)                                                         | < 0.001                                                   | 402288     |
|                  | 40                                   | -0.40 (-0.50, -0.31)                                                        | -0.01 (-0.06, 0.03)                                                         | < 0.001                                                   | 402287     |
|                  | 45                                   | -0.36 (-0.45, -0.27)                                                        | 0.00 (-0.05, 0.05)                                                          | < 0.001                                                   | 402288     |
|                  | 50                                   | -0.33 (-0.41, -0.24)                                                        | 0.00 (-0.05, 0.05)                                                          | < 0.001                                                   | 402290     |
|                  | RCS                                  |                                                                             |                                                                             |                                                           | 402104     |
| Contrast volume  | 30                                   | -2.27 (-3.27, -1.28)                                                        | -0.56 (-0.93, -0.20)                                                        | 0.002                                                     | 613601     |
|                  | 35                                   | -2.10 (-2.96, -1.24)                                                        | -0.50 (-0.87, -0.13)                                                        | 0.001                                                     | 613601     |
|                  | 40                                   | -2.02 (-2.78, -1.25)                                                        | -0.41 (-0.79, -0.03)                                                        | < 0.001                                                   | 613599     |
|                  | 45                                   | -1.91 (-2.61, -1.22)                                                        | -0.34 (-0.73, 0.05)                                                         | < 0.001                                                   | 613599     |
|                  | 50                                   | -1.79 (-2.43, -1.15)                                                        | -0.29 (-0.69, 0.11)                                                         | < 0.001                                                   | 613599     |
|                  | RCS                                  |                                                                             |                                                                             |                                                           | 613350     |

\* Slope and 95% CI estimates are for a 10 case increase in radial case volume

AIC indicates Akaike Information Criterion; RCS, restricted cubic spline

## **Supplemental Figure Legends**

### **Supplemental Figure 1. Relationship between Operator TRI Volume and Procedural Outcomes among Females**

Shown here are curves depicting the unadjusted and adjusted relationships between TRI volume and fluoroscopy times (A and B, respectively); unadjusted relationships between TRI volume and contrast volume (C and D, respectively), and unadjusted and adjusted relationships between TRI volume and procedure success (E and F, respectively). Dotted lines represent 95% confidence intervals.

### **Supplemental Figure 2. Relationship between Operator TRI Volume and Procedural Outcomes among Patients $\geq 75$ Years Old**

Shown here are curves depicting the unadjusted and adjusted relationships between TRI volume and fluoroscopy times (A and B, respectively); unadjusted relationships between TRI volume and contrast volume (C and D, respectively), and unadjusted and adjusted relationships between TRI volume and procedure success (E and F, respectively). Dotted lines represent 95% confidence intervals.

# Supplemental Figure 1

A.

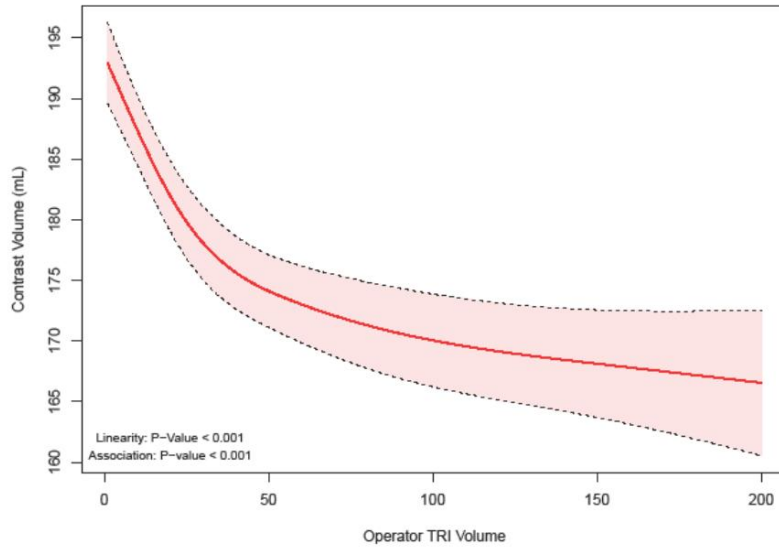

B.

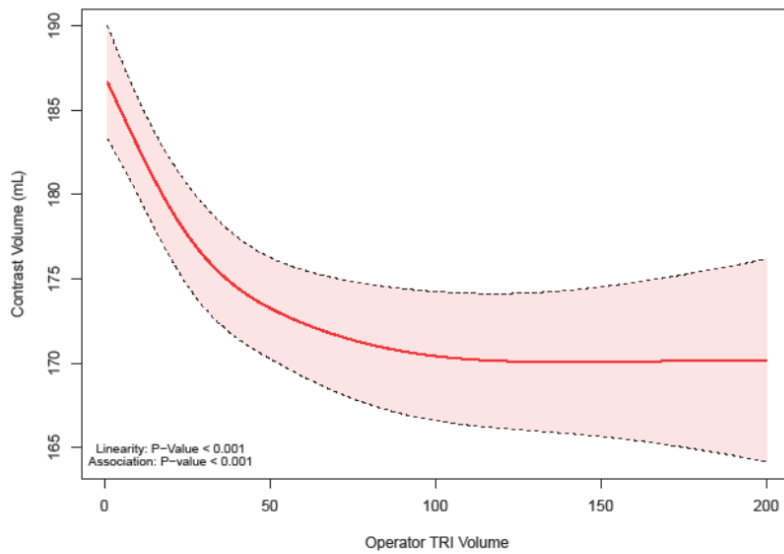

C.

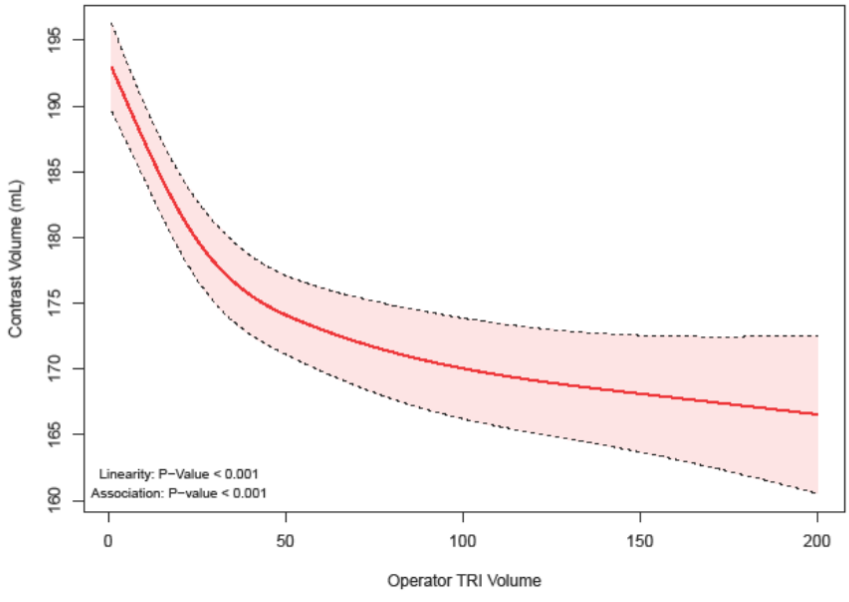

**D.**

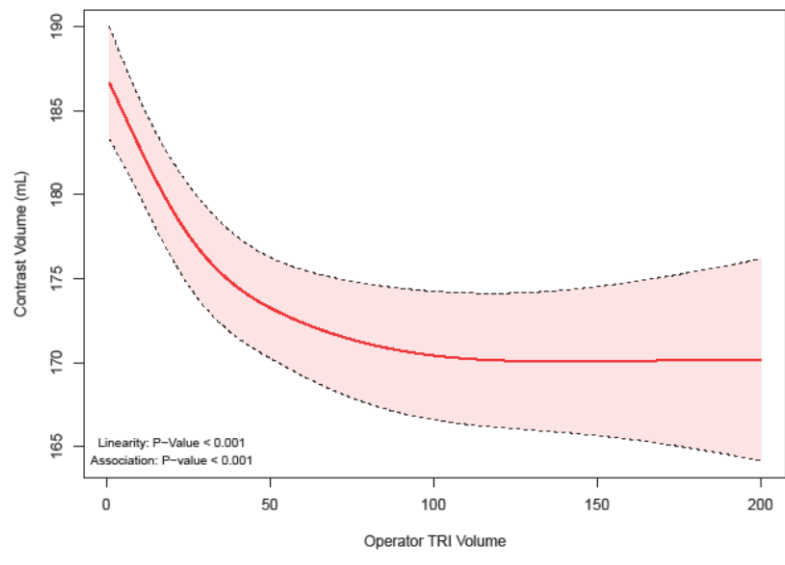

**E.**

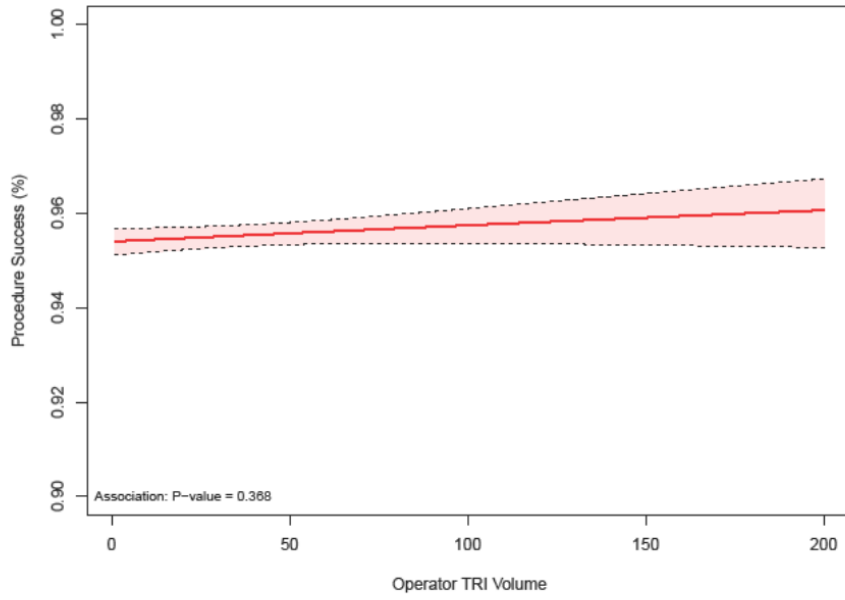

**F.**

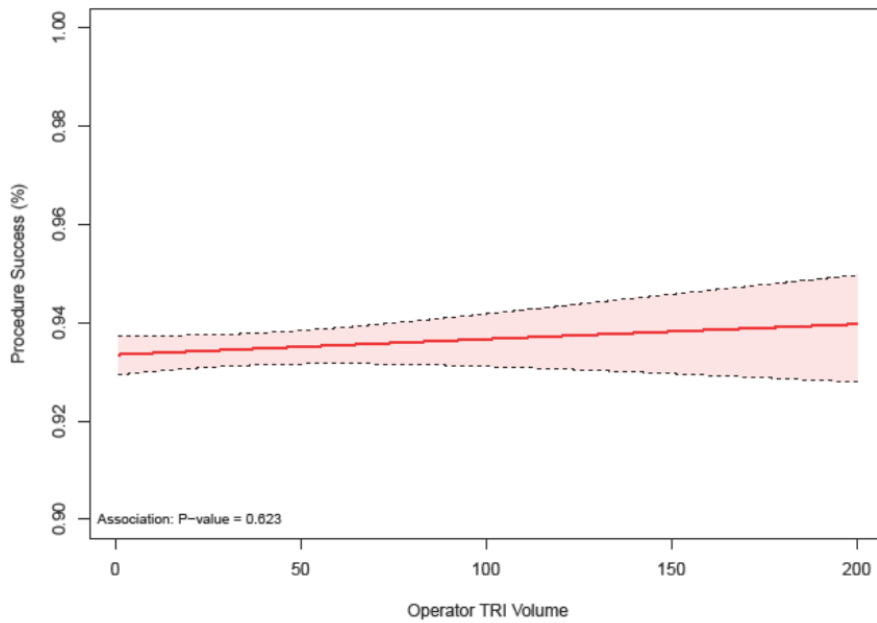

**Supplemental Figure 2**

**A.**

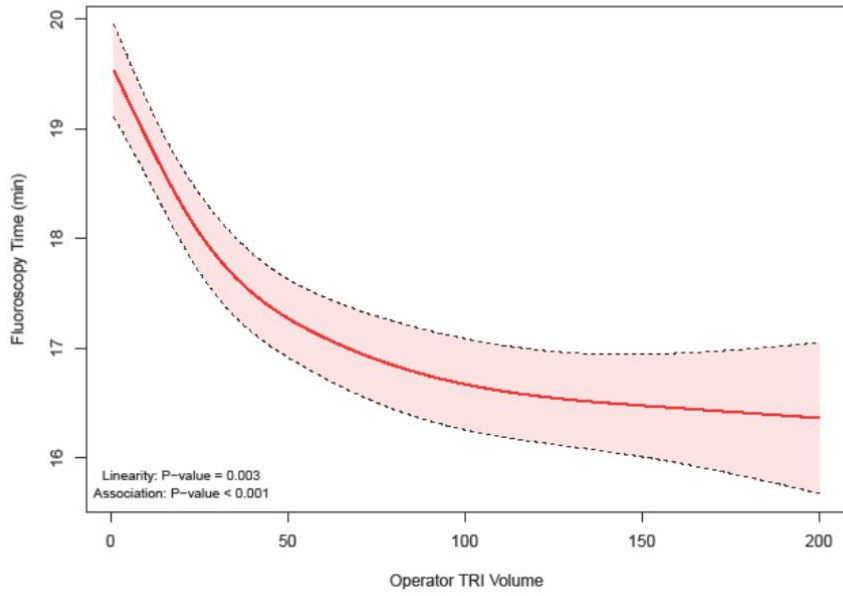

**B.**

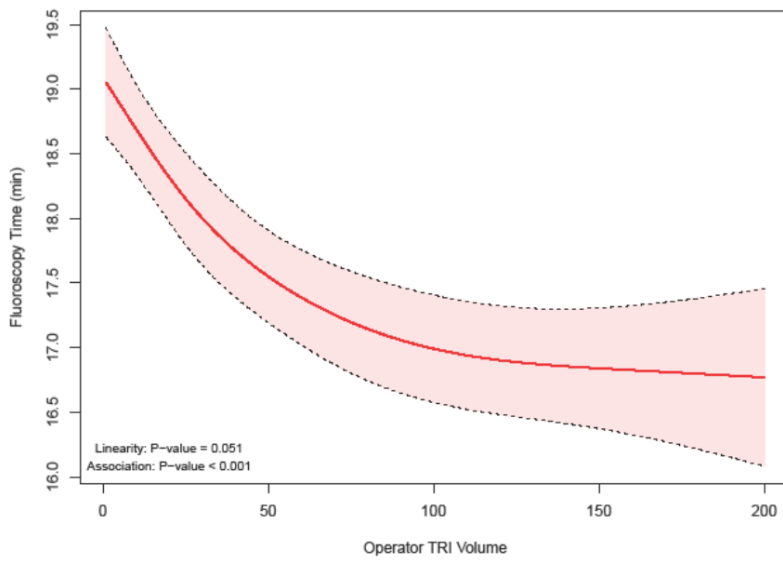

**C.**

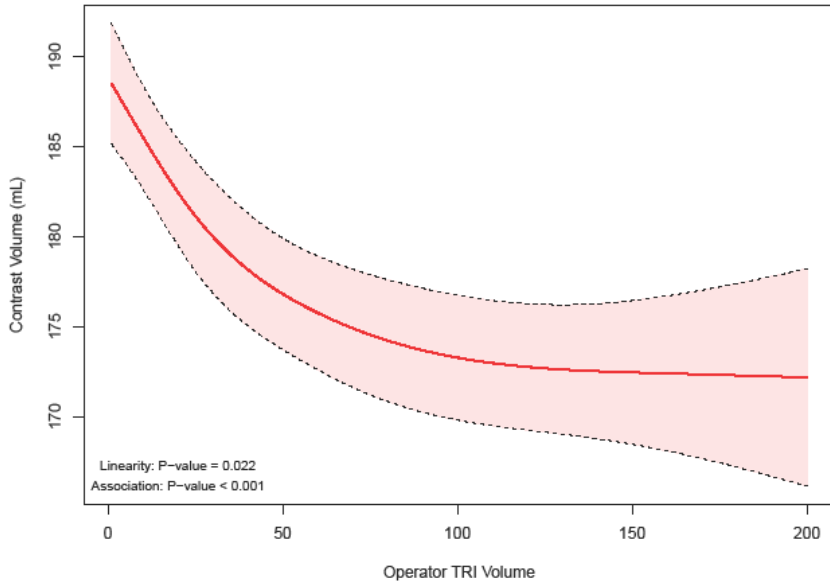

**D.**

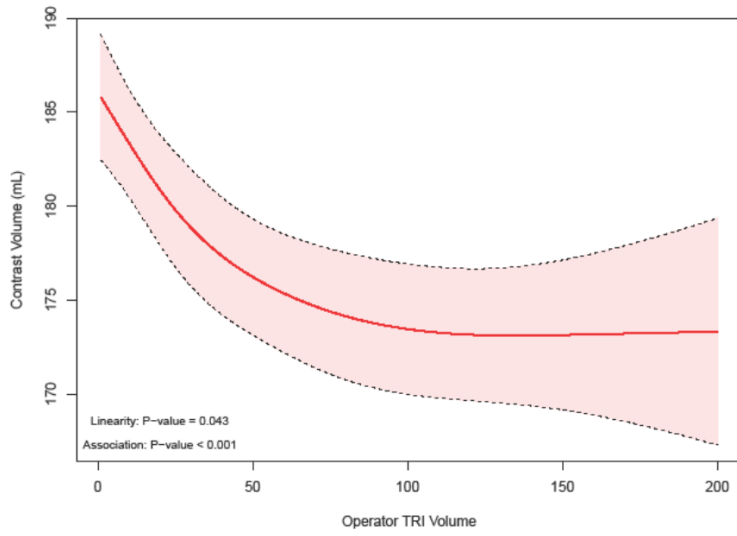

**E.**



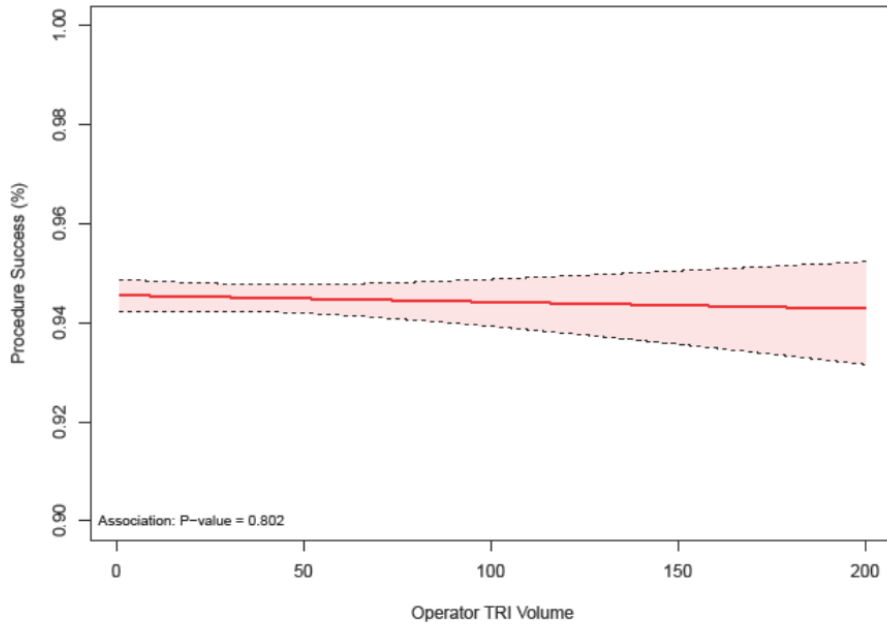

**F.**

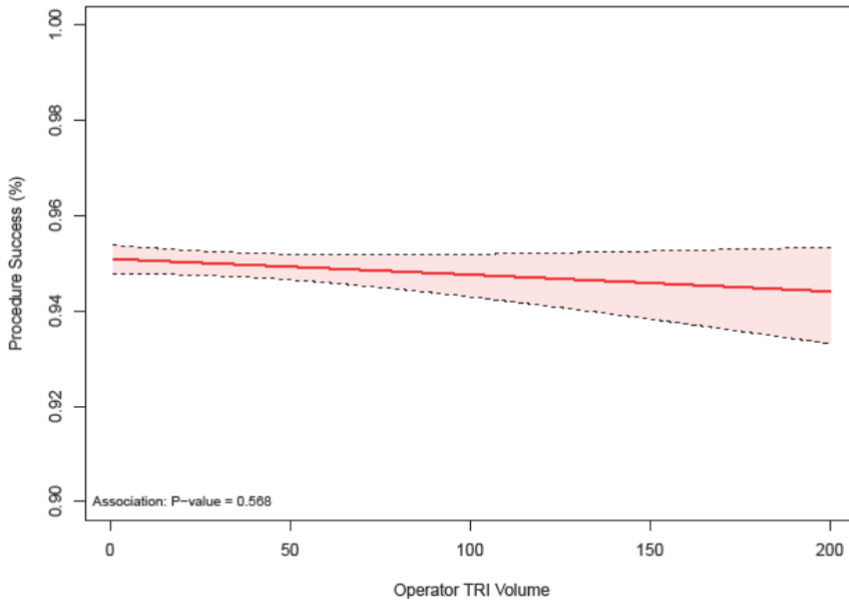

Supplement: NIHMS575982-supplement-supplemental_material.pdf [file NIHMS575982-supplement-supplemental_material.pdf]
